# Supplementary material for: Differences in Cell-Intrinsic Inflammatory Programs of Yolk Sac and Bone Marrow Macrophages
Source: MDPI journal article supplement (doi:10.3390/cells10123564), 2021-12-17
Supplement: s1 [file s1]

## **Supplemental Figures**

Sara Elhag, Christopher Stremmel, et al. Differences in cell-intrinsic inflammatory programs of yolk sac and bone marrow macrophages

# Supplemental Figure S1

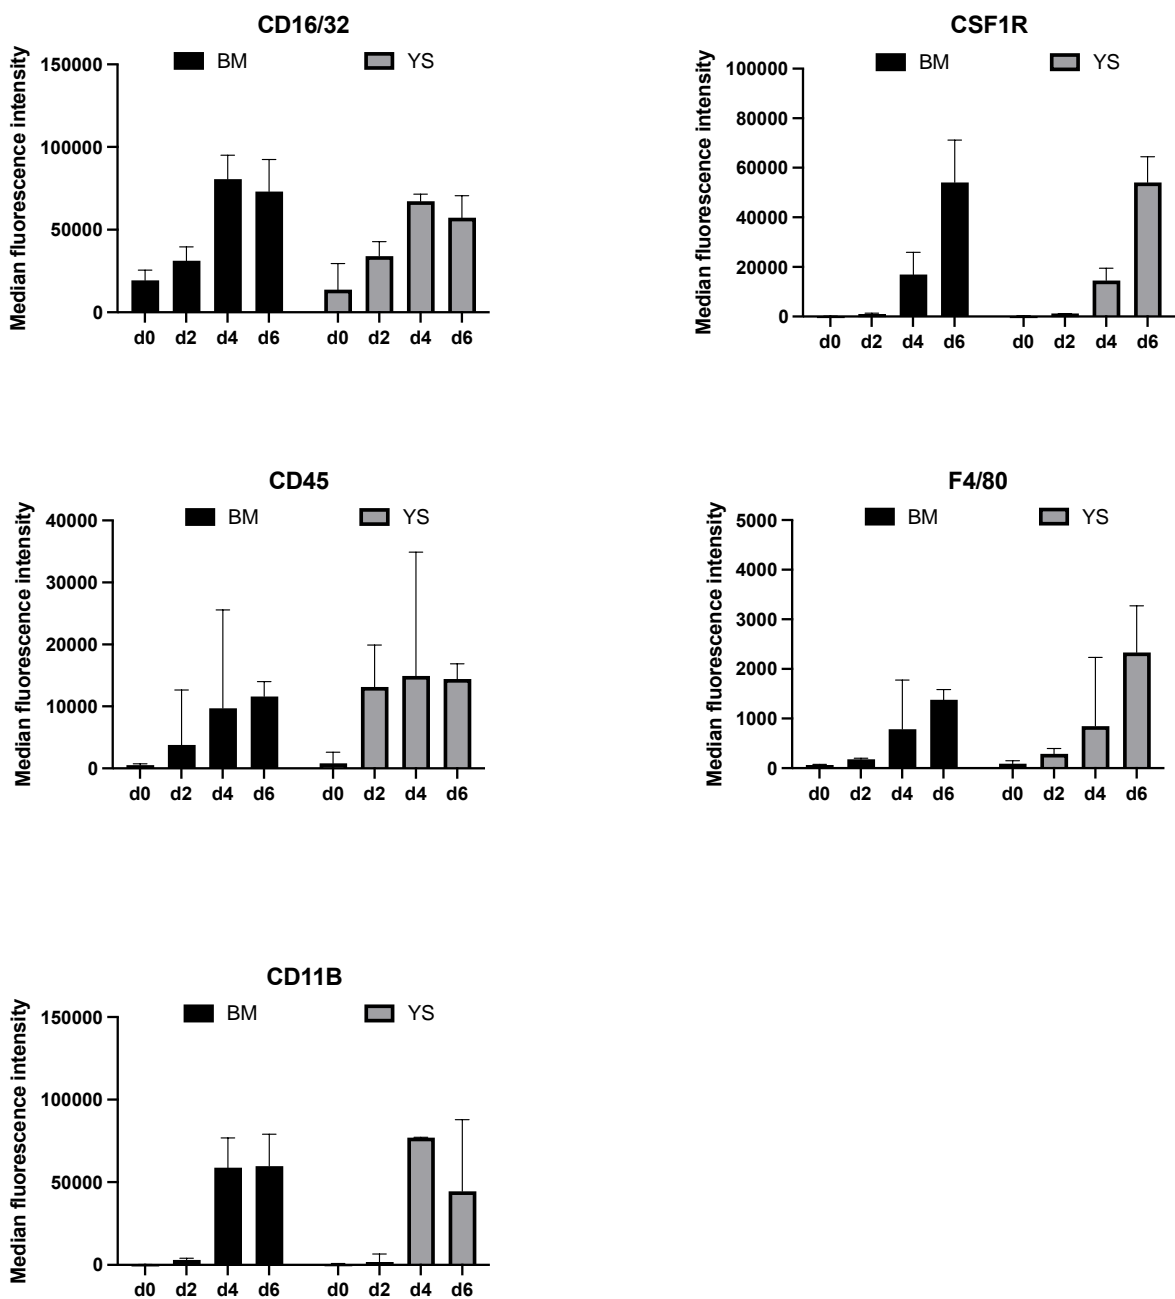

**Figure S1:** Median fluorescence intensities of immune cell markers. Flow cytometry of BM and YS Hoxb8 macrophages at different days of differentiation. Day (d)0 represents undifferentiated state. Median fluorescence intensity + interquartile range is indicated. N=3 per each timepoint.

Supplemental Figure S2

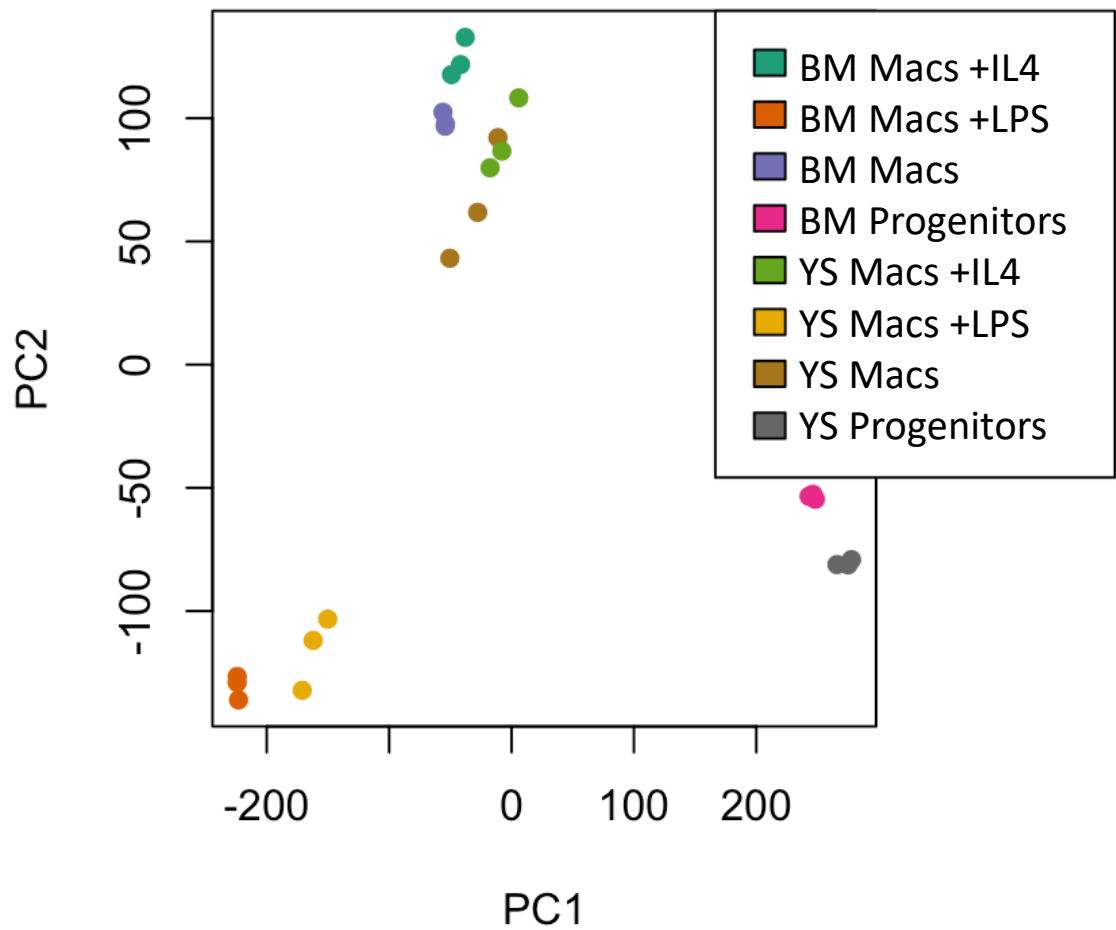

**Figure S2:** Principal component analysis for RNA expression profiles of YS and BM Hoxb8 progenitors and differentiated macrophages either unstimulated or stimulated with IL4 or LPS as indicated (n=3 independent experiments).

# Supplemental Figure S3

A) Venn diagram

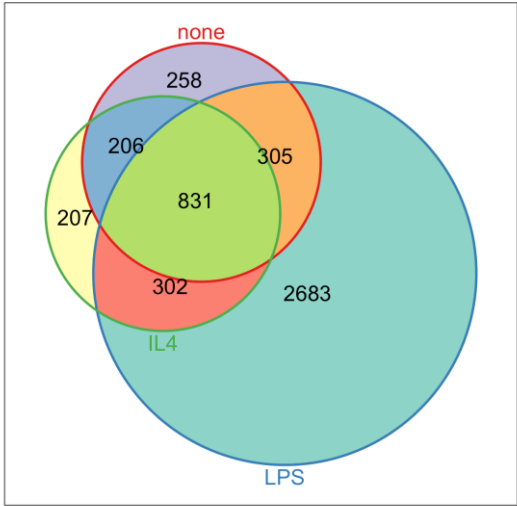

B) Top10 differentially expressed genes per condition

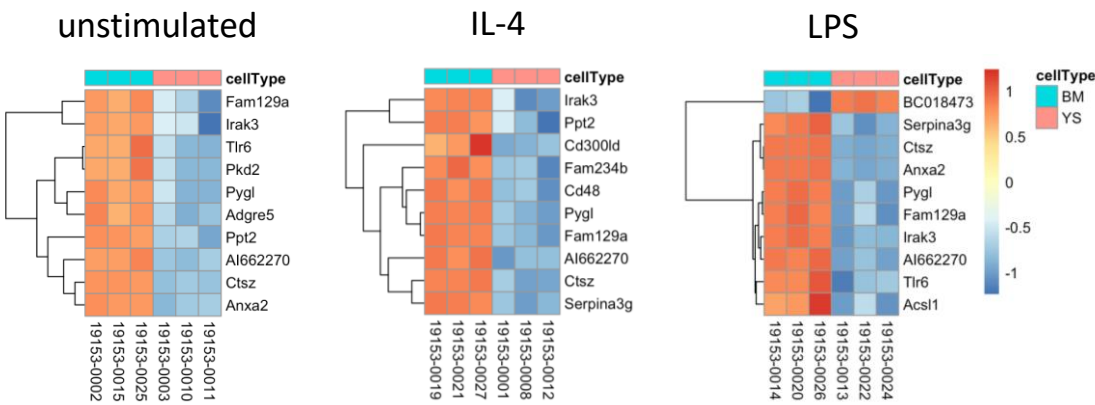

**Figure S3:** Differential gene expression of YS compared to BM Hoxb8 macrophages in response to IL-4 and LPS stimulation. A) Venn diagram of the differentially expressed genes related to the transcriptome analysis in main figure 3. Cutoff FDR < 0.1. B) Heatmap display of top10 differentially regulated genes for YS versus BM in unstimulated macrophages as well as IL-4 and LPS stimulation.

Supplemental Figure S4

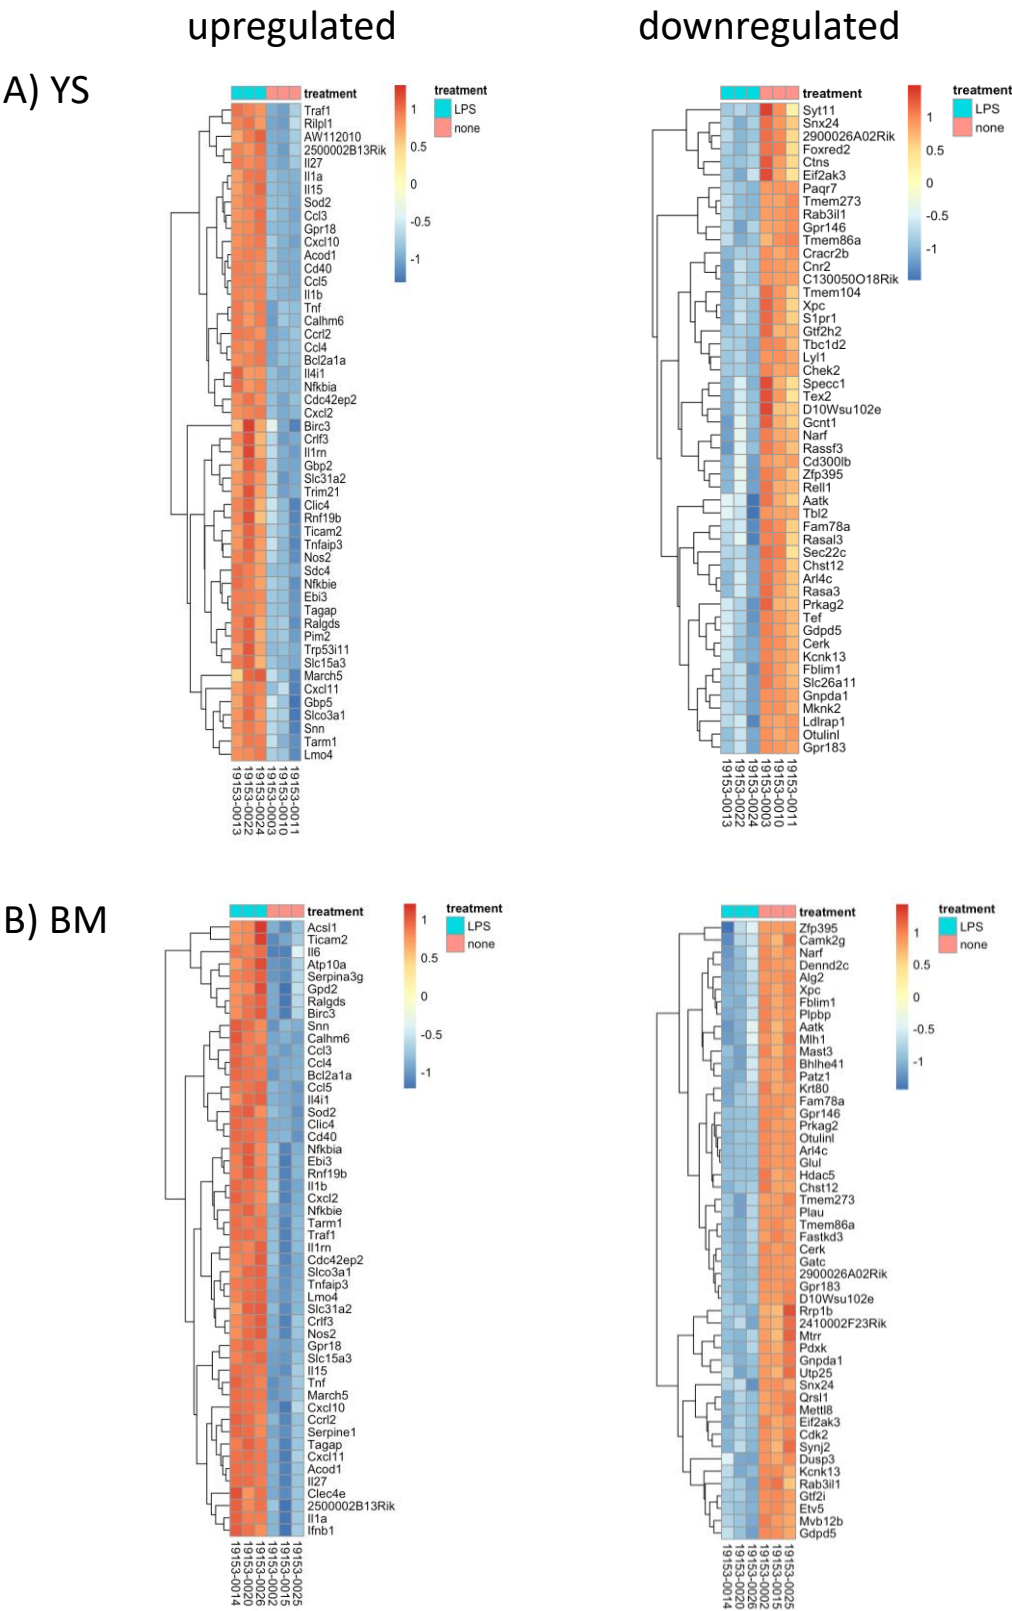

**Figure S4:** LPS-induced changes in gene expression in YS (A) and BM (B) Hoxb8 macrophages. Heatmap display of top50 upregulated (left panels) and downregulated (right panels) genes.

# Supplemental Figure S5

## GSEA

### Hallmark gene sets

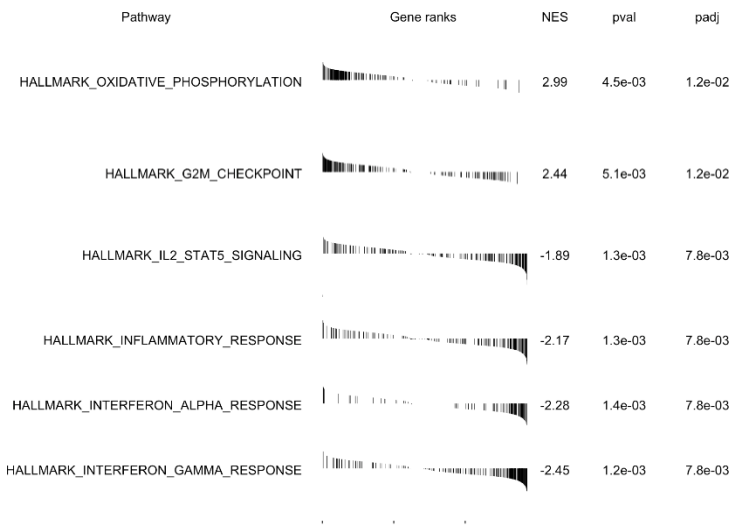

## GO gene sets

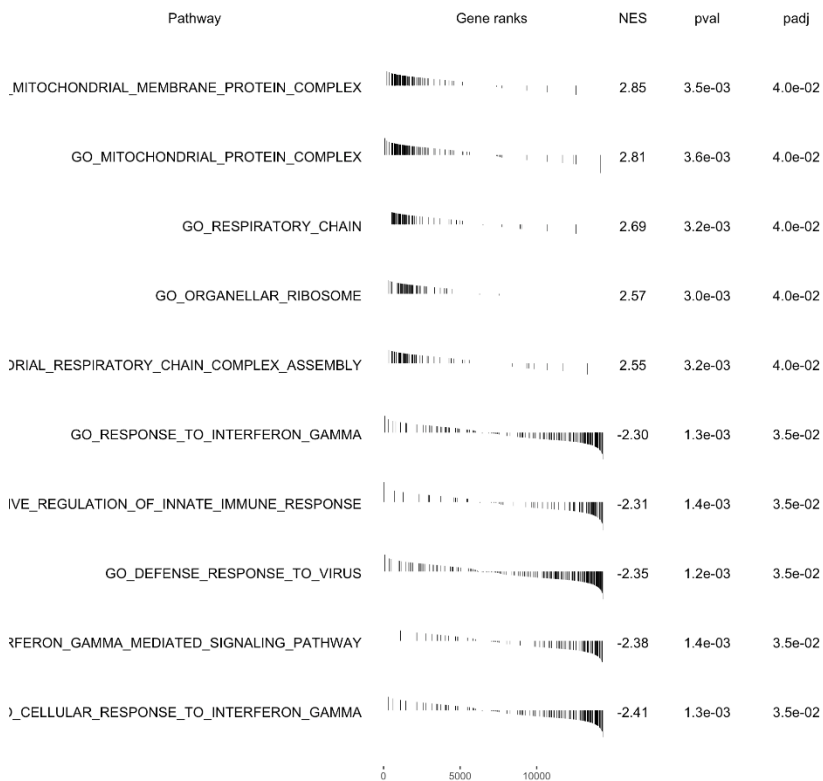

**Figure S5:** Gene Set (GSEA) and Gene Ontology (GO) term enrichment analysis of Hoxb8 YS and BM macrophages.

Supplemental Figure S6

A) OCR

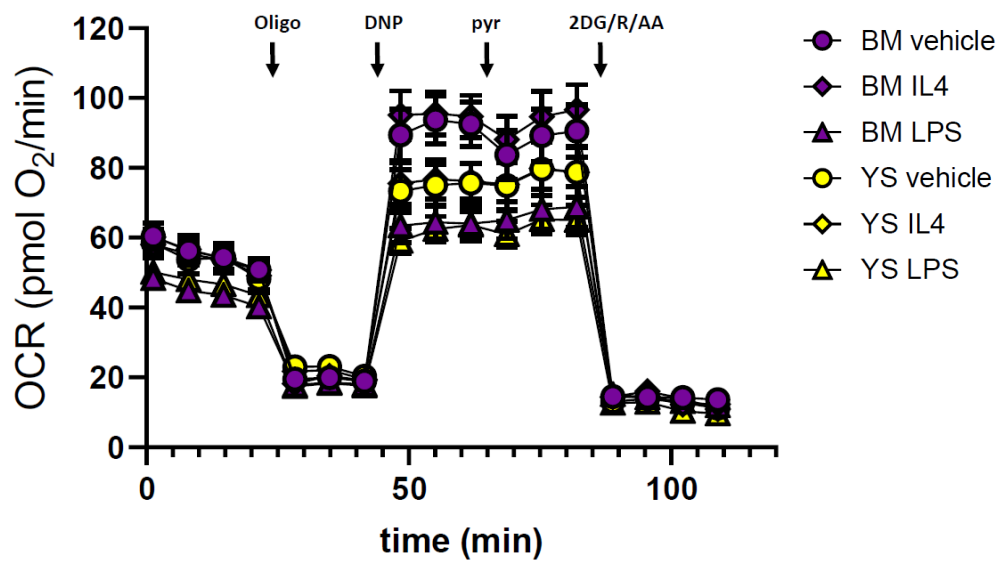

B) ECAR

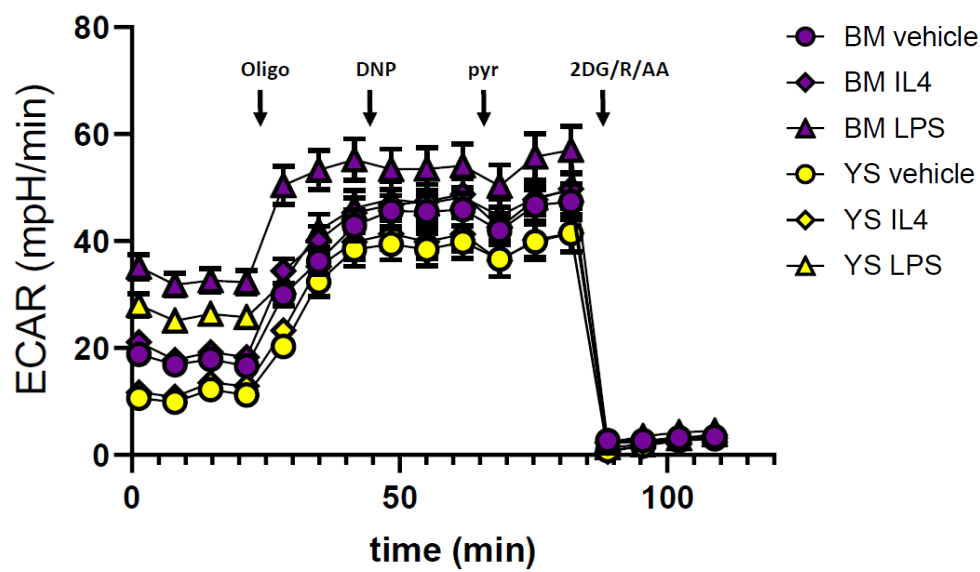

**Figure S6:** Measurements of oxygen consumption rate (OCR, panel A) and extracellular acidification rate (ECAR, panel B). Time laps traces for BM and YS Hoxb8 macrophages stimulated with LPS or IL4 4h prior to Seahorse XF96 run. Data are the mean +/- SEM of 26-29 wells per condition measured on three independent days.

Supplemental Figure S7

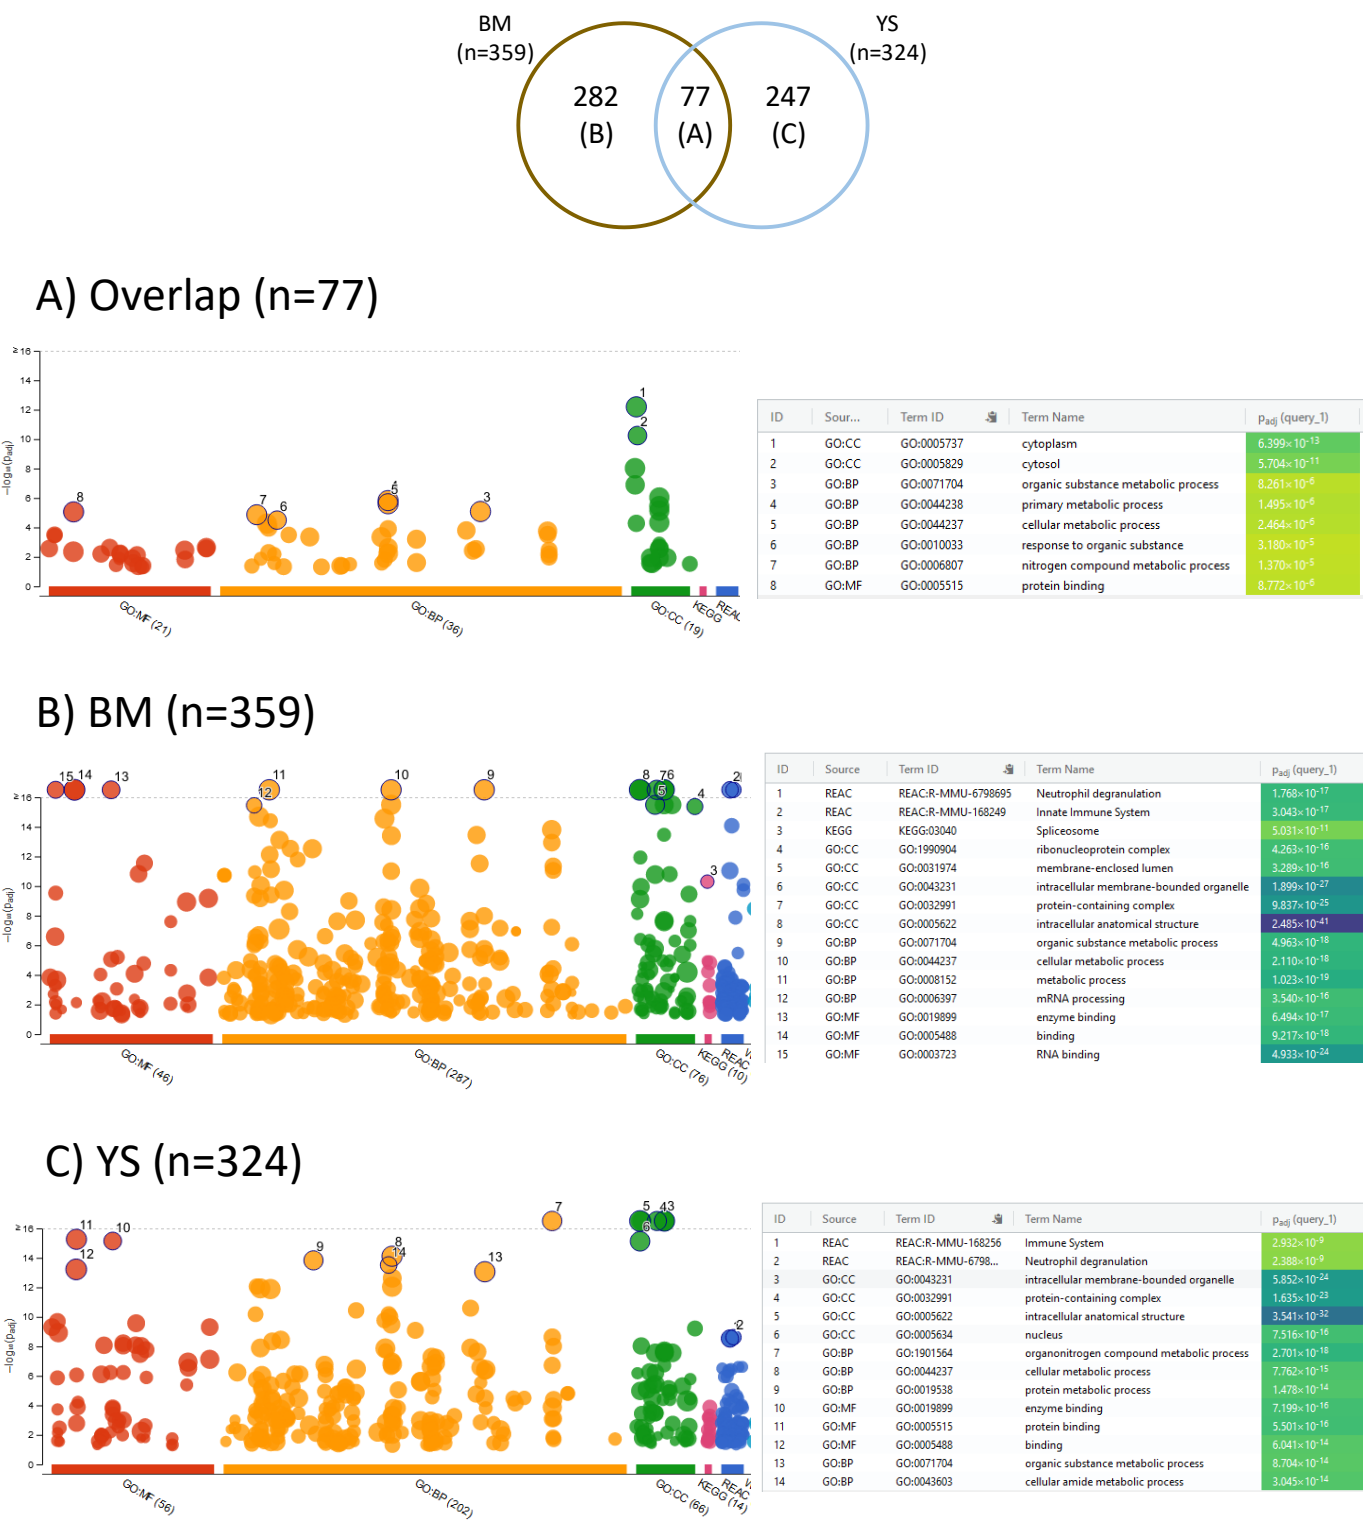

**Figure S7:** g:profiler enrichment analysis indicates LPS-induced changes in protein abundance and related pathways for proteins altered in both cell types (A), and for BM (B) and YS (C) Hoxb8 macrophages. p< 0.05.



# Supplemental Figure S8

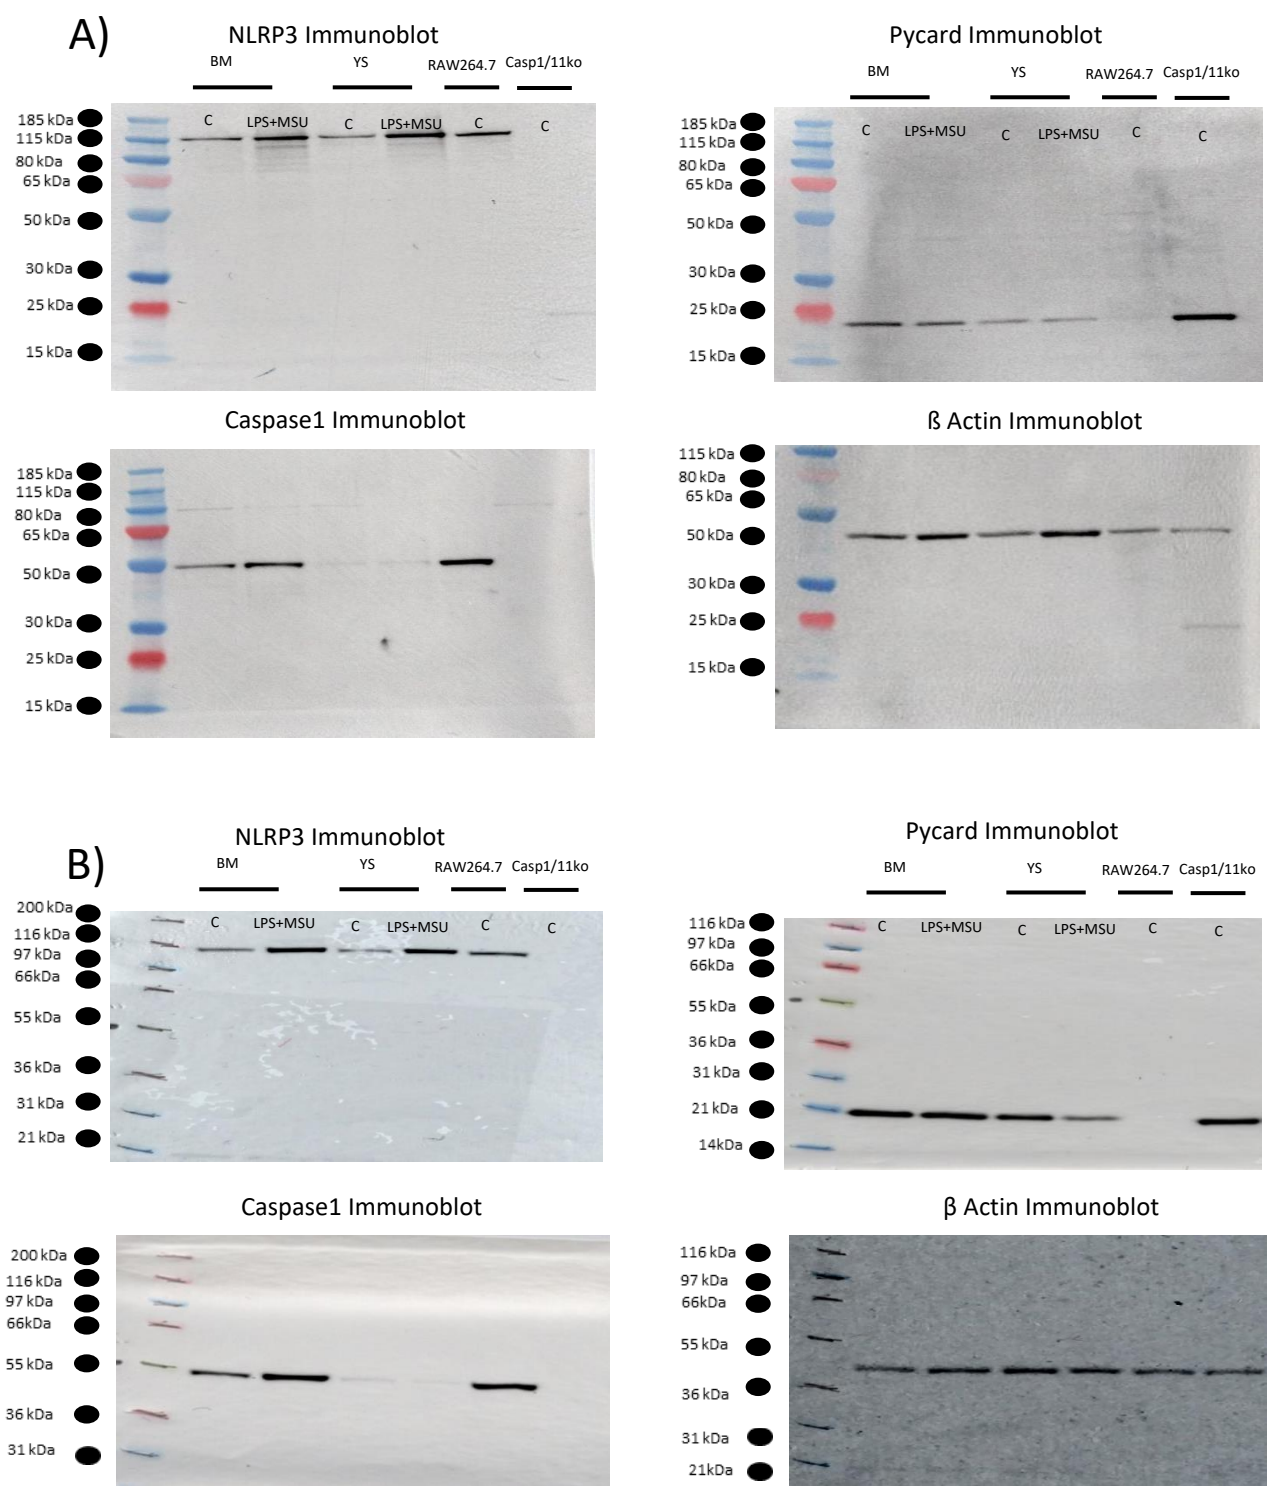

Supplemental Figure S8 (continued)

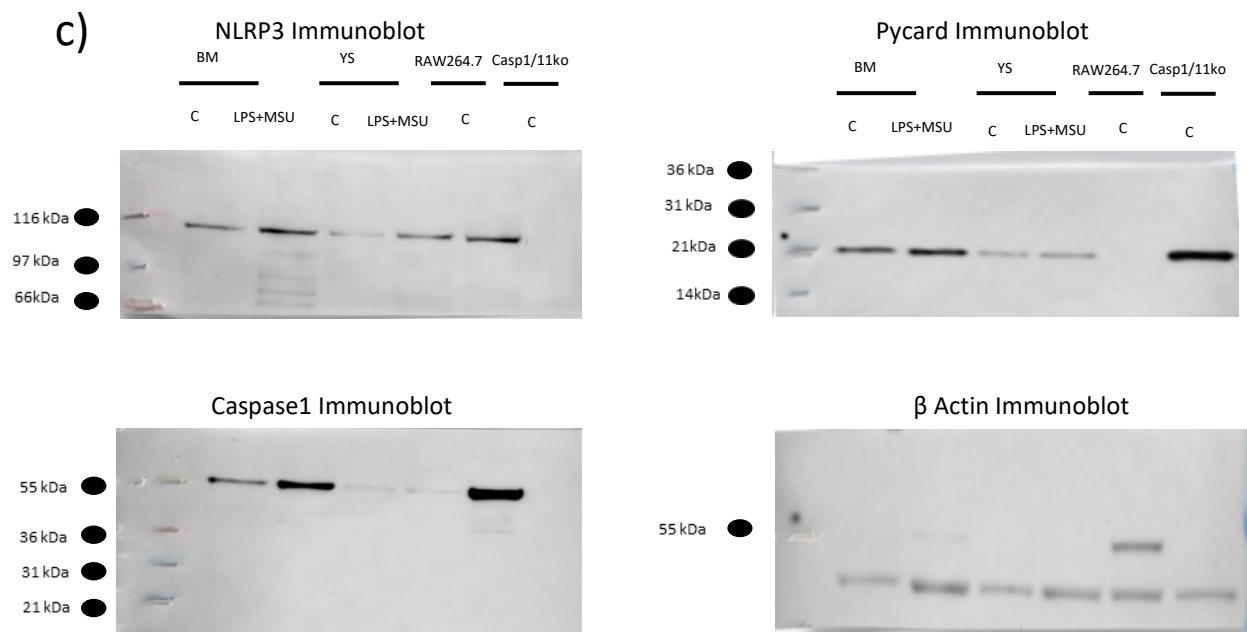

**Figure S8:** Full images of immunoblots related to figures 4f-g. (A-C) NLRP3 (118kDa), Caspase1 (50kDa), Pycard (21.6 kDa) and  $\beta$ -actin (42 kDa) expression in BM and YS Hoxb8 macrophages after 3 hours of LPS priming and 24 hours of stimulation with MSU crystals, compared to control (C). RAW264.7 cells and Hoxb8 macrophages from Casp1/11-knockout mice were used as control.

Supplemental Figure S9

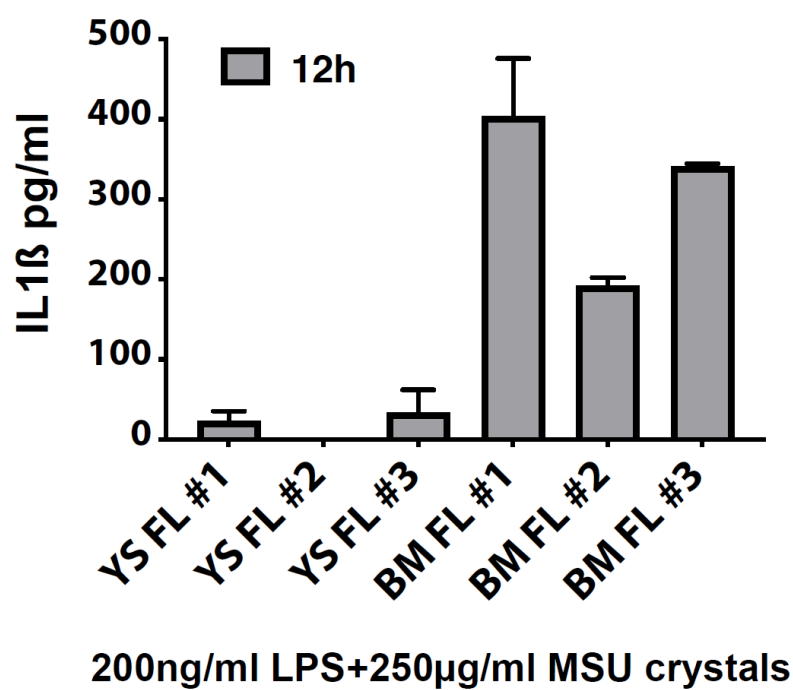

**Figure S9:** IL1 $\beta$  expression analysis by ELISA in the supernatant of LPS-primed crystal-stimulated (12h MSU) YS and BM HoxB8 FL macrophages.
